# Supplementary material
Source: PubMed Central journal article supplement (PMC7415188)
Supplement: NIHMS1605309-supplement-Supplemental_Data.pdf [file NIHMS1605309-supplement-Supplemental_Data.pdf]

**eTable 1:** International Classification of Diseases for Oncology, third edition (ICD-O-3) codes for each index potentially HPV-associated cancer

| <b>Index malignancies</b> | <b>ICD-O-3 primary site codes</b>             | <b>ICD-O-3 Histology codes</b>   |
|---------------------------|-----------------------------------------------|----------------------------------|
| Oropharyngeal             | C10.0-C10.9, C09.0-C09.9, C01.9, C02.4, C14.2 | 8052, 8070-8076, 8078, 8083-8084 |
| Anal                      | C20.9                                         | 8052, 8070-8076, 8078, 8083-8084 |
| Uterine cervix            | C53.0-C53.9                                   | ---                              |
| Vaginal                   | C52.9                                         | 8052, 8070-8076, 8078, 8083-8084 |
| Vulva                     | C51.0-51.9                                    | 8052, 8070-8076, 8078, 8083-8084 |
| Penile                    | C60.0-60.9                                    | 8052, 8070-8076, 8078, 8083-8084 |

**eTable 2:** Anatomic sites at elevated risks of SPMN<sup>#</sup> according to site of index potentially HPV-associated cancer, by gender, SEER 2000-2015

| Site of index HPV-associated cancer | Site of SPM                                                          | Observed SPM                                                         | SIR Rate 95% CI      | EAR per 10000 PYR    |        |
|-------------------------------------|----------------------------------------------------------------------|----------------------------------------------------------------------|----------------------|----------------------|--------|
| <i>Overall</i>                      |                                                                      |                                                                      |                      |                      |        |
| All index HPV-associated cancer     | <b>All Sites excluding Non-Melanoma Skin Non-HPV-associated SPMN</b> | 8,203                                                                | 1.73 (1.69, 1.77)    | 70.72                |        |
|                                     | Lung and Bronchus                                                    | 1,828                                                                | 2.93 (2.80, 3.07)    | 24.63                |        |
|                                     | Oral Cavity and Pharynx                                              | 840                                                                  | 7.30 (6.82, 7.81)    | 14.83                |        |
|                                     | Esophagus                                                            | 188                                                                  | 4.09 (3.53, 4.72)    | 2.91                 |        |
|                                     | Pharynx                                                              | 135                                                                  | 8.50 (7.13, 10.06)   | 2.44                 |        |
|                                     | Thyroid                                                              | 218                                                                  | 1.80 (1.57, 2.05)    | 1.98                 |        |
|                                     | Kidney and Renal Pelvis                                              | 246                                                                  | 1.56 (1.37, 1.77)    | 1.81                 |        |
|                                     | Larynx                                                               | 109                                                                  | 3.13 (2.57, 3.77)    | 1.52                 |        |
|                                     | Urinary Bladder                                                      | 265                                                                  | 1.32 (1.17, 1.49)    | 1.31                 |        |
|                                     | <b>HPV-associated SPMN</b>                                           |                                                                      |                      |                      |        |
|                                     | Vulva                                                                | 409                                                                  | 26.76 (24.23, 29.48) | 8.05                 |        |
|                                     | Vaginal                                                              | 171                                                                  | 36.36 (31.11, 42.23) | 3.40                 |        |
|                                     | Cervical                                                             | 144                                                                  | 3.36 (2.83, 3.95)    | 2.07                 |        |
|                                     | Penile                                                               | 60                                                                   | 17.56 (13.40, 22.61) | 1.16                 |        |
|                                     | Anal                                                                 | 136                                                                  | 1.44 (1.21, 1.70)    | 0.85                 |        |
|                                     | Oropharynx                                                           | 44                                                                   | 9.58 (6.96, 12.87)   | 0.81                 |        |
|                                     | <i>Both male and female</i>                                          |                                                                      |                      |                      |        |
|                                     | <b>Oropharynx</b>                                                    | <b>All Sites excluding Non-Melanoma Skin Non-HPV-associated SPMN</b> | 4,001                | 1.83 (1.78, 1.89)    | 109.78 |
|                                     |                                                                      | Lung and Bronchus                                                    | 1,038                | 3.48 (3.27, 3.70)    | 44.67  |
|                                     |                                                                      | Tongue                                                               | 344                  | 14.83 (13.30, 16.48) | 19.36  |
| Esophagus                           |                                                                      | 168                                                                  | 5.35 (4.57, 6.23)    | 8.25                 |        |
| Pharynx                             |                                                                      | 123                                                                  | 11.76 (9.78, 14.03)  | 6.79                 |        |
| Larynx                              |                                                                      | 94                                                                   | 3.84 (3.10, 4.70)    | 4.20                 |        |
| Hypopharynx                         |                                                                      | 58                                                                   | 12.31 (9.35, 15.91)  | 3.22                 |        |
| Thyroid                             |                                                                      | 78                                                                   | 2.75 (2.18, 3.43)    | 3.00                 |        |
| Floor of Mouth                      |                                                                      | 45                                                                   | 11.86 (8.65, 15.87)  | 2.49                 |        |
| Kidney and Renal Pelvis             |                                                                      | 117                                                                  | 1.33 (1.10, 1.59)    | 1.75                 |        |
| Nasopharynx                         |                                                                      | 25                                                                   | 9.78 (6.33, 14.43)   | 1.35                 |        |
| <b>HPV-associated SPMN</b>          |                                                                      |                                                                      |                      |                      |        |
| Anal                                |                                                                      | 58                                                                   | 1.23 (0.94, 1.59)    | 0.66                 |        |
| Vulvar                              |                                                                      | 4                                                                    | 2.22 (0.60, 5.68)    | 0.13                 |        |
| Cervical                            |                                                                      | 5                                                                    | 1.53 (0.49, 3.56)    | 0.10                 |        |
| Vaginal                             |                                                                      | 2                                                                    | 3.64 (0.41, 13.13)   | 0.09                 |        |
| Penile                              |                                                                      | 3                                                                    | 1.03 (0.21, 3.01)    | 0.01                 |        |

**Anal**

|                                              |     |                     |       |
|----------------------------------------------|-----|---------------------|-------|
| <b>All Sites excluding Non-Melanoma Skin</b> | 138 | 1.37 (1.15, 1.61)   | 45.32 |
| <b>Non-HPV-associated SPMN</b>               |     |                     |       |
| Lung and Bronchus                            | 22  | 1.50 (0.94, 2.28)   | 9.02  |
| Soft Tissue including Heart                  | 3   | 5.39 (1.08, 15.75)  | 2.99  |
| Acute Myeloid Leukemia                       | 3   | 3.85 (0.77, 11.23)  | 2.72  |
| Kidney and Renal Pelvis                      | 5   | 1.61 (0.52, 3.75)   | 2.31  |
| <b>HPV-associated SPMN</b>                   |     |                     |       |
| Vaginal                                      | 3   | 22.63 (4.55, 66.11) | 3.51  |
| Vulva                                        | 2   | 4.59 (0.52, 16.58)  | 1.92  |
| Cervical                                     | 2   | 2.74 (0.31, 9.89)   | 1.56  |
| Penile                                       | 0   | 0.00 (0.00, 68.92)  | -0.07 |
| Oropharynx                                   | 0   | 0.00 (0.00, 46.47)  | -0.10 |

**Male****Oropharynx**

|                                              |       |                      |        |
|----------------------------------------------|-------|----------------------|--------|
| <b>All Sites excluding Non-Melanoma Skin</b> | 3,318 | 1.76 (1.70, 1.82)    | 103.41 |
| <b>Non-HPV-associated SPMN</b>               |       |                      |        |
| Lung and Bronchus                            | 849   | 3.33 (3.11, 3.57)    | 42.87  |
| Tongue                                       | 268   | 12.27 (10.85, 13.84) | 17.76  |
| Esophagus                                    | 135   | 4.51 (3.78, 5.34)    | 7.58   |
| Pharynx                                      | 100   | 10.06 (8.18, 12.23)  | 6.50   |
| Larynx                                       | 77    | 3.28 (2.59, 4.10)    | 3.86   |
| Thyroid                                      | 70    | 3.47 (2.71, 4.39)    | 3.60   |
| Hypopharynx                                  | 47    | 10.41 (7.65, 13.84)  | 3.06   |
| Floor of Mouth                               | 31    | 8.80 (5.98, 12.50)   | 1.98   |
| Kidney and Renal Pelvis                      | 104   | 1.30 (1.06, 1.58)    | 1.74   |
| Nasopharynx                                  | 21    | 8.79 (5.44, 13.44)   | 1.34   |
| <b>HPV-associated SPMN</b>                   |       |                      |        |
| Anal                                         | 54    | 1.29 (0.97, 1.68)    | 0.87   |
| Penile                                       | 3     | 1.03 (0.21, 3.01)    | 0.01   |
| Cervical                                     | NA    | NA                   | NA     |
| Vaginal                                      | NA    | NA                   | NA     |
| Vulvar                                       | NA    | NA                   | NA     |

**Anal**

|                                              |    |                     |       |
|----------------------------------------------|----|---------------------|-------|
| <b>All Sites excluding Non-Melanoma Skin</b> | 40 | 1.28 (0.91, 1.74)   | 39.73 |
| <b>Non-HPV-associated SPMN</b>               |    |                     |       |
| Lung and Bronchus                            | 8  | 1.78 (0.77, 3.51)   | 16.12 |
| Acute Myeloid Leukemia                       | 3  | 11.48 (2.31, 33.55) | 12.57 |
| Pancreas                                     | 2  | 2.25 (0.25, 8.12)   | 5.10  |
| Colorectal                                   | 3  | 1.44 (0.29, 4.19)   | 4.18  |
| Esophagus                                    | 1  | 2.08 (0.03, 11.60)  | 2.39  |
| Stomach                                      | 1  | 1.64 (0.02, 9.10)   | 1.78  |
| <b>HPV-associated SPMN</b>                   |    |                     |       |
| Oropharynx                                   | 0  | 0.00 (0.00, 82.02)  | -0.21 |
| Penile                                       | 0  | 0.00 (0.00, 68.92)  | -0.24 |

|               |                                              |     |                    |       |
|---------------|----------------------------------------------|-----|--------------------|-------|
|               | Cervical                                     | NA  | NA                 | NA    |
|               | Vaginal                                      | NA  | NA                 | NA    |
|               | Vulvar                                       | NA  | NA                 | NA    |
| <b>Penile</b> |                                              |     |                    |       |
|               | <b>All Sites excluding Non-Melanoma Skin</b> | 361 | 1.41 (1.27, 1.57)  | 76.78 |
|               | <b>Non-HPV-associated SPMN</b>               |     |                    |       |
|               | Lung and Bronchus                            | 83  | 2.12 (1.69, 2.63)  | 31.89 |
|               | Kidney and Renal Pelvis                      | 18  | 1.91 (1.13, 3.02)  | 6.23  |
|               | Liver                                        | 8   | 1.64 (0.70, 3.23)  | 2.26  |
|               | Acute Myeloid Leukemia                       | 5   | 2.17 (0.70, 5.05)  | 1.96  |
|               | Pancreas                                     | 10  | 1.34 (0.64, 2.46)  | 1.84  |
|               | Floor of Mouth                               | 2   | 5.65 (0.63, 20.39) | 1.20  |
|               | <b>HPV-associated SPMN</b>                   |     |                    |       |
|               | Anal                                         | 7   | 1.35 (0.54, 2.77)  | 1.31  |
|               | Oropharynx                                   | 0   | 0.00 (0.00, 12.43) | -0.21 |
|               | Cervical                                     | NA  | NA                 | NA    |
|               | Vaginal                                      | NA  | NA                 | NA    |
|               | Vulvar                                       | NA  | NA                 | NA    |

*Female*

|                   |                                              |     |                      |        |
|-------------------|----------------------------------------------|-----|----------------------|--------|
| <b>Oropharynx</b> |                                              |     |                      |        |
|                   | <b>All Sites excluding Non-Melanoma Skin</b> | 683 | 2.29 (2.12, 2.47)    | 142.42 |
|                   | <b>Non-HPV-associated SPMN</b>               |     |                      |        |
|                   | Lung and Bronchus                            | 189 | 4.36 (3.76, 5.02)    | 53.90  |
|                   | Tongue                                       | 76  | 55.68 (43.87, 69.69) | 27.62  |
|                   | Esophagus                                    | 33  | 22.66 (15.59, 31.82) | 11.68  |
|                   | Pharynx                                      | 23  | 44.93 (28.47, 67.42) | 8.32   |
|                   | Larynx                                       | 17  | 16.94 (9.86, 27.12)  | 5.92   |
|                   | Floor of Mouth                               | 14  | 51.34 (28.01, 86.14) | 5.08   |
|                   | Colorectal                                   | 28  | 1.33 (0.89, 1.93)    | 2.59   |
|                   | Liver                                        | 9   | 3.41 (1.56, 6.48)    | 2.36   |
|                   | Kidney and Renal Pelvis                      | 13  | 1.62 (0.86, 2.77)    | 1.84   |
|                   | Nasopharynx                                  | 4   | 23.66 (6.37, 60.59)  | 1.42   |
|                   | Soft Tissue including Heart                  | 5   | 3.19 (1.03, 7.45)    | 1.27   |
|                   | Stomach                                      | 7   | 1.94 (0.78, 3.99)    | 1.25   |
|                   | <b>HPV-associated SPMN</b>                   |     |                      |        |
|                   | Vulvar                                       | 4   | 2.22 (0.60, 5.68)    | 0.81   |
|                   | Cervical                                     | 5   | 1.53 (0.49, 3.56)    | 0.64   |
|                   | Vaginal                                      | 2   | 3.64 (0.41, 13.13)   | 0.54   |
|                   | Anal                                         | 4   | 0.77 (0.21, 1.98)    | -0.44  |
|                   | Penile                                       | NA  | NA                   | NA     |
| <b>Anal</b>       |                                              |     |                      |        |
|                   | <b>All Sites excluding Non-Melanoma Skin</b> | 98  | 1.41 (1.15, 1.72)    | 47.76  |
|                   | <b>Non-HPV-associated SPMN</b>               |     |                      |        |
|                   | Lung and Bronchus                            | 14  | 1.38 (0.75, 2.31)    | 6.43   |
|                   | Soft Tissue including Heart                  | 3   | 8.15 (1.64, 23.81)   | 4.40   |

|                 |                                              |       |                      |        |
|-----------------|----------------------------------------------|-------|----------------------|--------|
|                 | Kidney and Renal Pelvis                      | 4     | 2.15 (0.58, 5.49)    | 3.57   |
|                 | Liver                                        | 2     | 3.30 (0.37, 11.93)   | 2.33   |
|                 | Urinary Bladder                              | 3     | 1.68 (0.34, 4.92)    | 2.03   |
|                 | Larynx                                       | 1     | 4.35 (0.06, 24.22)   | 1.29   |
|                 | <b>HPV-associated SPMN</b>                   |       |                      |        |
|                 | Vaginal                                      | 3     | 22.63 (4.55, 66.11)  | 4.79   |
|                 | Vulva                                        | 2     | 4.59 (0.52, 16.58)   | 2.61   |
|                 | Cervix Uteri                                 | 2     | 2.74 (0.31, 9.89)    | 2.12   |
|                 | Oropharynx                                   | 0     | 0.00 (0.00, 107.21)  | -0.06  |
|                 | Penile                                       | NA    | NA                   | NA     |
| <b>Cervical</b> |                                              |       |                      |        |
|                 | <b>All Sites excluding Non-Melanoma Skin</b> | 2,498 | 1.50 (1.44, 1.56)    | 32.56  |
|                 | <b>Non-HPV-associated SPMN</b>               |       |                      |        |
|                 | Lung and Bronchus                            | 478   | 2.49 (2.27, 2.72)    | 11.23  |
|                 | Urinary Bladder                              | 101   | 3.22 (2.62, 3.92)    | 2.73   |
|                 | Thyroid                                      | 117   | 1.53 (1.27, 1.84)    | 1.60   |
|                 | Kidney and Renal Pelvis                      | 77    | 1.79 (1.41, 2.24)    | 1.33   |
|                 | Ovary                                        | 76    | 1.52 (1.20, 1.90)    | 1.02   |
|                 | Colorectal                                   | 131   | 1.24 (1.03, 1.47)    | 1.00   |
|                 | <b>HPV-associated SPMN</b>                   |       |                      |        |
|                 | Vaginal                                      | 122   | 41.32 (34.31, 49.33) | 4.67   |
|                 | Vulva                                        | 45    | 4.80 (3.50, 6.43)    | 1.40   |
|                 | Anal                                         | 50    | 1.63 (1.21, 2.14)    | 0.76   |
|                 | Oropharynx                                   | 3     | 3.88 (0.78, 11.33)   | 0.09   |
|                 | Penile                                       | NA    | NA                   | NA     |
| <b>Vulvar</b>   |                                              |       |                      |        |
|                 | <b>All Sites excluding Non-Melanoma Skin</b> | 1,045 | 2.29 (2.16, 2.44)    | 150.28 |
|                 | <b>Non-HPV-associated SPMN</b>               |       |                      |        |
|                 | Lung and Bronchus                            | 178   | 2.66 (2.28, 3.08)    | 28.30  |
|                 | Kidney and Renal Pelvis                      | 26    | 2.20 (1.44, 3.22)    | 3.62   |
|                 | Urinary Bladder                              | 20    | 1.57 (0.96, 2.42)    | 1.85   |
|                 | Liver                                        | 9     | 2.24 (1.02, 4.25)    | 1.27   |
|                 | Soft Tissue including Heart                  | 7     | 2.84 (1.14, 5.84)    | 1.16   |
|                 | Thyroid                                      | 15    | 1.38 (0.77, 2.28)    | 1.06   |
|                 | Tongue                                       | 6     | 2.97 (1.08, 6.47)    | 1.02   |
|                 | <b>HPV-associated SPMN</b>                   |       |                      |        |
|                 | Vagina                                       | 29    | 32.54 (21.79, 46.74) | 7.17   |
|                 | Cervix Uteri                                 | 16    | 3.42 (1.95, 5.56)    | 2.89   |
|                 | Anal                                         | 9     | 1.10 (0.50, 2.09)    | 0.21   |
|                 | Oropharynx                                   | 1     | 4.70 (0.06, 26.17)   | 0.20   |
|                 | Penile                                       | NA    | NA                   | NA     |
| <b>Vaginal</b>  |                                              |       |                      |        |
|                 | <b>All Sites excluding Non-Melanoma Skin</b> | 164   | 1.85 (1.57, 2.15)    | 103.70 |
|                 | <b>Non-HPV-associated SPMN</b>               |       |                      |        |
|                 | Lung and Bronchus                            | 29    | 2.19 (1.47, 3.15)    | 21.74  |
|                 | Colorectal                                   | 14    | 1.84 (1.01, 3.09)    | 8.82   |

|                            |    |                      |       |
|----------------------------|----|----------------------|-------|
| Urinary Bladder            | 6  | 2.43 (0.89, 5.29)    | 4.87  |
| Thyroid                    | 5  | 2.58 (0.83, 6.02)    | 4.22  |
| Female Breast              | 26 | 1.06 (0.69, 1.55)    | 2.01  |
| Liver                      | 2  | 2.32 (0.26, 8.37)    | 1.57  |
| Floor of Mouth             | 1  | 12.86 (0.17, 71.56)  | 1.27  |
| Lip                        | 1  | 11.13 (0.15, 61.92)  | 1.26  |
| <b>HPV-associated SPMN</b> |    |                      |       |
| Vulva                      | 22 | 37.98 (23.79, 57.50) | 29.55 |
| Cervix Uteri               | 3  | 3.38 (0.68, 9.86)    | 2.91  |
| Oropharynx                 | 0  | 0.00 (0.00, 88.37)   | -0.06 |
| Anal                       | 1  | 0.62 (0.01, 3.47)    | -0.83 |
| Penile                     | NA | NA                   | NA    |

SPMN = Second primary malignant neoplasm; SEER = Surveillance, Epidemiology, and End Results; SIR = Standardized incidence ratio; EAR = Excess absolute risk; PYR = Person-year at risk; CI = Confidence interval  
<sup>#</sup>Only non-HPV-associated SPMNs with EAR  $\geq$ 1 are shown
